# Supplementary material
Source: PubMed Central journal article supplement (PMC7256950)
Supplement: oc0c00501_si_001.pdf [file oc0c00501_si_001.pdf]

# Supporting Information

## ASSAY TECHNIQUES AND TEST DEVELOPMENT FOR COVID-19 DIAGNOSIS

Authors:

Linda J Carter\*<sup>1</sup>, Linda V Garner\*<sup>1</sup>, Jeffrey W Smoot<sup>1</sup>, Yingzhu Li<sup>1</sup>, Qiongqiong Zhou<sup>1</sup>, Catherine J Saveson<sup>1</sup>, Janet M Sasso<sup>1</sup>, Anne C Gregg<sup>1</sup>, Divya J Soares<sup>1</sup>, Tiffany R Beskid<sup>1</sup>, Susan R Jervey<sup>1</sup>, Cynthia Liu\*\*<sup>1</sup>

\*These authors contributed equally.

\*\*Corresponding author: [cliu@cas.org](mailto:cliu@cas.org)

<sup>1</sup>Affiliation: CAS- a division of the American Chemical Society

## Supporting Information

### Statement

This supporting information includes: (1) descriptions of selected molecular genetic tests for COVID-19 diagnosis, (2) tables S1 and S2 highlight over 200 of the currently available molecular, serological and immunological diagnostic tests, (3) highlights of patented technology for diagnosis of related coronavirus such as SARS-CoV and MERS-CoV, and (4) selected patents with SARS-CoV-related sequences for potential applications in diagnostics.

### Supporting Information I. Descriptions of selected molecular genetic tests for COVID-19 diagnosis

LabCorp COVID-19 RT-PCR test (US FDA 3/16/20), is a 1-step real-time RT-PCR test which uses a TaqPath 1-step RT-PCR master mix for qualitative detection of RNA from SARS-CoV-2 in upper and lower respiratory specimens. This test uses three DNA primer and probe sets to detect three regions in the virus nucleocapsid (N) gene and one control primer-probe set to detect human RNase P in a clinical sample. During the amplification phase, the probe anneals to a specific target sequence located between the forward and reverse primers. During the subsequent extension phase of the PCR cycle, the 5'-nuclease activity of Taq polymerase degrades the bound probe, causing a reporter dye (FAM) to separate from a quencher dye (BHQ1) and generate a fluorescent signal, the intensity of which is monitored at each PCR cycle.<sup>1</sup> On April 20, 2020, LabCorp's at home COVID-19 test (called Pixel) received EUA approval from the US FDA. This test includes a nasal swab that allows individuals to collect a sample from the comfort of their home and a shipping package to be used to return the sample to the lab for testing.<sup>2</sup>

CDC 2019-Novel Coronavirus (2019-nCoV) Real-Time RT-PCR Diagnostic Panel (US FDA 2/4/20) contains full instructions for the CDC RT-PCR-based diagnostic test for detection and diagnosis of SARS-CoV-2 along with oligonucleotide primers and dual-labeled hydrolysis probes (TaqMan) and control material used in rRT-PCR of respiratory specimens. In addition, the CDC maintains a list of primers and probes intended for

SARS-CoV-2 Real-Time RT-PCR diagnostic testing, distributed by the International Reagent Resource.<sup>3</sup>

ThermoFisher-Applied Biosystems TaqPath COVID-19 Combo Kit (US FDA 3/13/20) consists of both the TaqPath RT-PCR COVID-19 Kit and the TaqPath COVID-19 Control Kit. The TaqPath RT-PCR COVID-19 Kit is a multiplex real-time RT-PCR that includes three primers and one probe sets designed to detect the nucleocapid (N) and spike (S) genes of SARS-CoV-2. In addition to the primers and probes, the TaqPath RT-PCR COVID-19 Kit contains MS2, an internal positive control. The TaqPath COVID-19 Control Kit contains an external positive RNA control that contains in vitro transcribed RNA specific for N, S and ORF1ab regions of SARS-CoV-2.<sup>4</sup>

Seegene Allplex 2019-nCoV Assay (CE mark 2/22/20 and Korea MFDS 2/12/20 and US FDA 4/21/20) is a real-time RT-PCR assay for simultaneous detection and identification of three target genes (RdRP and N genes of SARS-CoV-2 and E gene from Sarbecovirus which includes SARS-CoV-2) in a single assay. The assay uses FAM to label the E gene-specific probe, Cal Red 610 to label the RdRP gene-specific probe and Quasar 670 to label the N gene-specific probe.<sup>5</sup>

cobas SARS-CoV-2 (Australia 2/20/20, CE mark 2020, and US FDA 3/12/20) is a real-time RT-PCR that amplifies a specific target unique to SARS-CoV-2 along with a conserved region of the E gene. It includes fully automated sample preparation (nucleic acid extraction and purification) followed by reverse transcription, PCR amplification and detection on the cobas 6800/8800 system, or other authorized instruments.<sup>6</sup>

ID NOW COVID-19 (US 3/27/20) is an automated assay that utilizes isothermal nucleic acid amplification technology for detection of SARS-CoV-2 RdRP gene. Fluorescently-labeled molecular beacons are used to specifically identify each of the amplified RNA targets. To perform the assay, the Sample Receiver and Test base are inserted into the ID NOW™ Instrument. The test delivers high-quality molecular positive results in as little as 5 minutes.<sup>7, 8</sup>

**Table S1. Examples of molecular diagnostic tests used to detect viral genetic material in SARS-CoV-2**<sup>9-11</sup>

| No. | Test Name                                           | Test Type                                        | Manufacturer/ Organization Name                                     | Sample Source                                                                                      | Gene or Region detected    | Test result time/ Additional Information                                                                                                                      | Country of approval                            |
|-----|-----------------------------------------------------|--------------------------------------------------|---------------------------------------------------------------------|----------------------------------------------------------------------------------------------------|----------------------------|---------------------------------------------------------------------------------------------------------------------------------------------------------------|------------------------------------------------|
| 1   | 2019-nCoV RT-qPCR                                   | real-time RT-PCR                                 | 3DMed 3D Biomedicine Science & Technology Co. Ltd                   | nasopharyngeal and oropharyngeal swabs                                                             | ORF1ab, and E and N genes  | one-step real-time RT-PCR. N and E gene-specific probes labeled with FAM and ORF1ab region-specific probe labeled with ROX                                    | United States                                  |
| 2   | ID NOW COVID-19                                     | isothermal nucleic acid amplification technology | Abbott Diagnostics Scarborough, Inc. D2                             | nasal, nasopharyngeal and throat swabs                                                             | RdRP gene                  | positive results in ~ 5 minutes and negative results in 13 minutes, approved for use outside of lab                                                           | United States                                  |
| 3   | Abbott RealTime SARS-CoV-2 assay                    | real-time RT-PCR                                 | Abbott Molecular Inc. (USA) Abbott Laboratories Pte Ltd (Singapore) | nasal, nasopharyngeal and oropharyngeal swabs                                                      | N and RdRP genes           | The Abbott RealTime SARS-CoV-2 assay in combination with the realTime m2000 system, testing volumes (24-96 samples) and up to 470 patient samples in 24 hours | Brazil<br>Canada<br>Singapore<br>United States |
| 4   | AcuCorona 2.0                                       | real-time RT-PCR                                 | Acumen Research Laboratories                                        | nasopharyngeal or oropharyngeal swabs, sputum and bronchoalveolar lavage fluid                     | E and RdRP genes           | The design is targeted at achieving high-throughput testing, reduced manual steps and cold-chain logistics, and overall robust results                        | Singapore                                      |
| 5   | SARS-CoV-2 Test                                     | real-time RT-PCR                                 | AIT laboratory                                                      | nasopharyngeal and oropharyngeal swabs, and sputum                                                 | E, N and RdRP genes        |                                                                                                                                                               | United States                                  |
| 6   | abTES COVID-19 qPCR I Kit                           | qualitative (real-time) RT-PCR                   | AITbiotech Pte Ltd                                                  | nasopharyngeal and throat swabs, sputum and serum                                                  | N gene (N1 and N2 regions) | lab-on-chip platform                                                                                                                                          | Singapore                                      |
| 7   | RealStar SARS-CoV-2 RT-PCR Kits U.S.                | real-time RT-PCR                                 | altona Diagnostics GmbH                                             | nasopharyngeal, oropharyngeal, anterior nasal, and mid-turbinate swabs, and nasal washes/aspirates |                            |                                                                                                                                                               |                                                |
| 8   | Nucleic Acid reagent test kit for novel coronavirus | hybridization capture immunofluorescence         | Anbio (Xiamen) Biotechnology Co., Ltd.                              | oropharyngeal swabs, sputum                                                                        | ORF1ab, and E and N genes  | rapid pathogen detection                                                                                                                                      | China                                          |

|    |                                                                                           |                                       |                                                          |                                                   |                            |                                                                                  |               |
|----|-------------------------------------------------------------------------------------------|---------------------------------------|----------------------------------------------------------|---------------------------------------------------|----------------------------|----------------------------------------------------------------------------------|---------------|
|    | 2019-nCoV (hybridization capture immunofluorescence)                                      |                                       |                                                          |                                                   |                            |                                                                                  |               |
| 9  | iAMP COVID-19 Detection Kit                                                               | real-time RT isothermal amplification | Atila BioSystems, Inc.                                   | nasal, nasopharyngeal, and oropharyngeal swabs    | ORF1ab and/or N gene       | results in < 1.5 hours                                                           | United States |
| 10 | AusDiagnostics respiratory virus panel (including SARS-CoV-2) test                        | multiplexed tandem PCR                | AusDiagnostics Pty Ltd (Australia)                       | respiratory samples                               | ORF1a and ORF8             | extracts within a 3-hour timeframe                                               | Australia     |
| 11 | AvellinoCoV 2 test                                                                        | real-time RT-PCR                      | Avellino Lab USA, Inc.                                   | nasopharyngeal and oropharyngeal swabs            | N gene (two regions)       | results in 1.5-3 hours                                                           | United States |
| 12 | COVID-19 RT-PCR Test                                                                      | real-time RT-PCR                      | Baptist Hospital Miami Pathology/Laboratory Medicine Lab | nasopharyngeal and oropharyngeal swabs            | RdRP and N genes           |                                                                                  | United States |
| 13 | SARS-CoV-2 S gene for BD Max                                                              | real time RT-PCR                      | Becton Dickinson Surgical Industries, LTD.               | nasopharyngeal and oropharyngeal swabs            | S gene                     | results for up to 24 samples in < 3 hours                                        | Brazil        |
| 14 | BD SARS-CoV-2 Reagents for BD MAX System                                                  | real time RT-PCR                      | Becton, Dickinson and Company (BD)                       | nasal, nasopharyngeal and oropharyngeal swabs     | N gene (N1 and N2 regions) |                                                                                  | United States |
| 15 | BioGX SARS-CoV-2 Reagents for BD MAX System                                               | real-time RT-PCR                      | Becton, Dickinson, BioGx                                 | nasopharyngeal and oropharyngeal swabs            | N gene (N1 and N2 regions) | results in ~2-3 hours, each BD MAX™ System can process 24 samples simultaneously | United States |
| 16 | Nucleic Acid reagent test kit for novel coronavirus 2019-nCoV (fluorometric PCR)          | fluorometric PCR                      | Beijing Applied Biological Technologies Co., Ltd         | oropharyngeal swabs, sputum                       | ORF1ab, and E and N genes  | rapid pathogen detection                                                         | China         |
| 17 | Nucleic Acid reagent test kit for novel coronavirus 2019-nCoV (fluorometric PCR)          | fluorometric PCR                      | BGI Biotechnology (Wuhan) Co., Ltd.                      | oropharyngeal swabs, bronchoalveolar lavage fluid | ORF1ab                     |                                                                                  | China         |
| 18 | Nucleic Acid reagent test kit for novel coronavirus 2019-nCoV (combinatorial probe anchor | RT-PCR and metagenomic sequencing     | BGI Biotechnology (Wuhan) Co., Ltd.                      | oropharyngeal swabs, bronchoalveolar lavage fluid | SARS-CoV-2 RNA             | results in a few hours                                                           | China         |

|    |                                                                                                    |                                                         |                                                                             |                                                                                                                          |                    |                                                                                                 |                                                   |
|----|----------------------------------------------------------------------------------------------------|---------------------------------------------------------|-----------------------------------------------------------------------------|--------------------------------------------------------------------------------------------------------------------------|--------------------|-------------------------------------------------------------------------------------------------|---------------------------------------------------|
|    | synthesis sequencing)                                                                              |                                                         |                                                                             |                                                                                                                          |                    |                                                                                                 |                                                   |
| 19 | Real-Time Fluorescent RT-PCR Kit for Detecting SARS-2019-nCoV                                      | fluorescent RT-PCR                                      | BGI Genomics Co. Ltd                                                        | bronchoalveolar lavage fluid and throat swabs                                                                            | ORF1ab             | results within 3 hours, detects as low as 100 viral copies/mL for BALF samples                  | United States                                     |
| 20 | BioFire COVID-19 Test                                                                              | multiplexed real-time RT-PCR                            | BioFire Defense, LLC bioMerieux                                             | nasopharyngeal swabs                                                                                                     | ORF1ab and ORF8    | results in ~ 45 minutes                                                                         | United States                                     |
| 21 | VIASURE SARS-CoV-2 Real-Time PCR Detection Kit                                                     | real-time RT-PCR                                        | Biomedical Equipment and Supplies, Hospitalares Ltda                        | nasopharyngeal swabs                                                                                                     | ORF1ab and N genes |                                                                                                 | Brazil                                            |
| 22 | Real-Q 2019- nCoV Detection Kit                                                                    | one-step real-time RT-PCR                               | BioSewoom Inc.                                                              | sputum, oropharyngeal and nasopharyngeal swabs                                                                           | E and RdRP genes   |                                                                                                 | South Korea                                       |
| 23 | Kit for Novel Coronavirus (2019-nCoV) RNA (Isothermal Amplification -Real Time Fluorescence Assay) | isothermal amplification n-real-time fluorescence assay | Biowalker Pte Ltd                                                           | oropharyngeal swabs and sputum                                                                                           | viral RNA          | results within 3 hours, detects as low as 100 viral copies/mL for BALF samples                  | Singapore                                         |
| 24 | Childrens-Altona-SARS-CoV-2 assay                                                                  | real-time RT-PCR                                        | Boston Children's Hospital Infectious Diseases Diagnostic Laboratory (IDDL) | nasopharyngeal, oropharyngeal, anterior nasal and mid-turbinate swabs, and sputum specimens                              | E and S genes      |                                                                                                 | United States                                     |
| 25 | CDC 2019- Novel Coronavirus (2019-nCoV) Real-Time RT-PCR Diagnostic Panel                          | real-time RT-PCR                                        | CDC-US                                                                      | nasopharyngeal or oropharyngeal aspirates/washes /swabs and bronchoalveolar lavage fluid, tracheal aspirates, and sputum | N gene             | human RNase P gene used as control                                                              | United States                                     |
| 26 | Xpert Xpress SARS-CoV-2 test                                                                       | real-time RT-PCR                                        | Cepheid                                                                     | nasopharyngeal, nasal, and mid-turbinate swabs                                                                           | E and N2 genes     | results in ~ 45 minutes with < 1 minute of hands-on time                                        | Australia<br>Canada<br>Singapore<br>United States |
| 27 | CRISPR-based tests for SARS-CoV-2                                                                  | CRISPR-based lateral flow assay isothermal              | Cepheid Sherlock Biosciences                                                | respiratory samples                                                                                                      |                    | combines Sherlock's Cas12 and Cas13 enzymes for nucleic acid detection with Cepheid's GeneXpert | United States                                     |

|    |                                                                                  | amplification                |                                                                               |                                                                                                 |                          | test-processing instruments                                               |               |
|----|----------------------------------------------------------------------------------|------------------------------|-------------------------------------------------------------------------------|-------------------------------------------------------------------------------------------------|--------------------------|---------------------------------------------------------------------------|---------------|
| 28 | VIASURE SARS-CoV-2 Real Time PCR Detection Kit                                   | real-time RT-PCR             | CerTest Biotec SL (Spain)                                                     | respiratory samples                                                                             | ORF1ab and N gene        | results in 2 hours                                                        | Australia     |
| 29 | VIASURE SARS-CoV-2 S gene Real Time PCR Detection Kit                            | real-time RT-PCR             | CerTest Biotec SL (Spain)                                                     | respiratory samples                                                                             | S gene                   | results in 2 hours                                                        | Australia     |
| 30 | SARS-CoV-2 RT-PCR test                                                           | real-time RT-PCR             | Children's Hospital of Philadelphia Infectious Disease Diagnostics Laboratory | nasopharyngeal and tracheal aspirates                                                           | N2 gene                  |                                                                           | United States |
| 31 | CIRRUSDx SARS-COV-2 Assay                                                        | real-time RT-PCR             | CirrusDx Laboratories                                                         | nasopharyngeal, oropharyngeal, and nasal swabs, and bronchoalveolar lavage fluid                | E, N, and RdRP genes     |                                                                           | United States |
| 32 | Logix Smart Coronavirus Disease 2019                                             | single-step real-time RT-PCR | CoDiagnostics, Inc.                                                           | bronchoalveolar lavage fluid, sputum, tracheal aspirate, nasopharyngeal fluids, and nasal swabs | RdRP gene                | results in 63-90 minutes                                                  | United States |
| 33 | VitaPCR SARS-CoV-2 Assay                                                         | real-time PCR                | Credo Diagnostics Biomedical Pte Ltd                                          | nasal and oropharyngeal swabs                                                                   | viral RNA                | results in 20 minutes with 1 minute of hands-on time                      | Singapore     |
| 34 | Nucleic Acid reagent test kit for novel coronavirus 2019-nCoV (fluorometric PCR) | fluorometric PCR             | Da An Gene Co., Ltd. - website unavailable                                    | oropharyngeal swabs, sputum                                                                     | ORF1ab and N gene        | rapid pathogen test                                                       | China         |
| 35 | QuantiVirus SARS-CoV-2 Test kit                                                  | real-time RT-PCR             | DiaCarta, Inc.                                                                | nasopharyngeal and oropharyngeal swabs, sputum                                                  | ORF1ab and E and N genes | results < 2 hours on most qPCR machines, sensitivity is 100 copies per mL | United States |
| 36 | LYRA SARS-CoV-2 ASSAY                                                            | real-time RT-PCR             | Diagnostic Hybrids, Inc. Quidel Corporation                                   | nasopharyngeal and oropharyngeal swabs                                                          | pp1ab                    | results in < 75 minutes after extraction                                  | Canada        |
| 37 | SARS-Cov-2 Assay                                                                 | real-time RT-PCR             | Diagnostic Molecular Laboratory – Northwestern Medicine                       | nasopharyngeal, oropharyngeal, nasal, and mid-turbinate swabs, and bronchoalveolar lavage fluid | N1 and RdRP genes        | results in < 1 hour without manual RNA extraction                         | United States |

|    |                                                           |                                                 |                                                              |                                                                                                     |                                        |                                                                                    |               |
|----|-----------------------------------------------------------|-------------------------------------------------|--------------------------------------------------------------|-----------------------------------------------------------------------------------------------------|----------------------------------------|------------------------------------------------------------------------------------|---------------|
| 38 | FORTITUDE KIT 2.0                                         | real-time RT-PCR                                | Diagnostics Development Hub (DxD)                            | nasopharyngeal swabs                                                                                | viral RNA genes less prone to mutation | results in 90 minutes, 96 samples in 1 run, 100,000 test kits/wk                   | Singapore     |
| 39 | Simplexa COVID-19 Direct                                  | real-time RT-PCR                                | DiaSorin Molecular LLC                                       | nasopharyngeal swabs                                                                                | ORF1ab and S gene                      | results in ~ 1 hour, no RNA extraction                                             | United States |
| 40 | SARS-CoV-2 RT-PCR Assay                                   | nested, end-point PCR followed by hybridization | Diatherix Eurofins Laboratory                                | nasal swabs, nasopharyngeal, oropharyngeal and throat swabs/washes, bronchial aspirates, and sputum | viral RNA                              |                                                                                    |               |
| 41 | Real-Time PCR Assay for the Detection of SARS-CoV-2 Virus | real-time RT-PCR                                | DSO National Laboratories                                    | nasopharyngeal swabs                                                                                | polymerase gene                        |                                                                                    | Singapore     |
| 42 | Loopamp Novel Coronavirus 2019 (SARSCoV-2) Detection Kit  | real-time RT-PCR                                | Eiken Chemical Co., Ltd.                                     | swabs and bronchoalveolar lavage fluid                                                              | ORF1ab and S gene                      | results in ~ 25 minutes                                                            | Japan         |
| 43 | SARS-CoV-2 Test                                           | real-time RT-PCR                                | Exact Sciences Laboratories                                  | nasopharyngeal, oropharyngeal, and nasal swabs                                                      | E, N and RdRP genes                    |                                                                                    | United States |
| 44 | Fosun COVID-19 RT-PCR Detection Kit                       | real-time RT-PCR                                | Fosun Pharma USA Inc.                                        | upper and lower respiratory specimens                                                               | ORF1b and N and E genes                | ORF1b detected using FAM, N gene detected using JOE, and E gene detected using ROE | United States |
| 45 | ePlex SARS-CoV-2 Test                                     | RT-PCR                                          | GenMark Diagnostics, Inc.                                    | nasopharyngeal swabs                                                                                | RNA                                    | < 2 minutes hands-on time and results in < 2 hours                                 | United States |
| 46 | GS COVID-RT-PCR Kit                                       | real-time RT-PCR                                | GenoSensor, LLC                                              | nasopharyngeal, oropharyngeal, nasal, and mid-turbinate nasal swabs                                 | ORF1ab and E and N genes               |                                                                                    | United States |
| 47 | Gnomegen COVID-19 RT-Digital PCR Detection Kit            | digital RT-PCR                                  | Gnomegen LLC                                                 | upper respiratory tract specimens                                                                   | N gene                                 | limit of detection of 2.5 copies per reaction, results in ~ 3 hours                | United States |
| 48 | SARS-CoV-2 Real-Time RT-PCR Assay                         | real-time RT-PCR                                | Guangzhou Wondfo Biotech Co., Ltd                            | respiratory samples                                                                                 | ORF1ab and N gene                      | limit of detection of 2.5 copies per reaction, results in ~ 3 hours                | China         |
| 49 | CDI Enhanced COVID-19 Test                                | real-time RT-PCR                                | Hackensack University Medical Center Molecular Pathology Lab | nasopharyngeal, oropharyngeal, nasal, and mid-turbinate nasal swabs                                 | E and N genes                          |                                                                                    | United States |
| 50 | Panther Fusion SARS-CoV-2                                 | real-time RT-PCR                                | Hologic Inc. (USA)                                           | nasopharyngeal and                                                                                  | ORF1ab regions 1 and 2                 | each Panther Fusion system can provide results in < 3 hours and                    | Australia     |



|    |                                     |                  |                                                                                 |                                                                                                                                            |                             |                                                                                            |               |
|----|-------------------------------------|------------------|---------------------------------------------------------------------------------|--------------------------------------------------------------------------------------------------------------------------------------------|-----------------------------|--------------------------------------------------------------------------------------------|---------------|
|    | Assay (Panther Fusion System)       |                  |                                                                                 | oropharyngeal swabs                                                                                                                        |                             | process up to 1,150 coronavirus tests in 24-hour period                                    | United States |
| 51 | Smart Detect SARS-CoV-2 rRT-PCR Kit | real-time RT-PCR | InBios International, Inc.                                                      | nasopharyngeal, anterior nasal and mid-turbinate nasal swabs                                                                               | E, N, and RdRP genes        | results in ~ 4 hours                                                                       | United States |
| 52 | SARS-CoV-2 RT-PCR test              | real-time RT-PCR | Infectious Disease Diagnostics Laboratory - Children's Hospital of Philadelphia | nasopharyngeal aspirates, nasopharyngeal, nasal and mid-turbinate nasal swabs, and tracheal aspirates and bronchoalveolar lavage specimens | N2 gene                     | testing limited to the hospital's CLIA-certified Infectious Disease Diagnostics Laboratory | United States |
| 53 | SARS-CoV-2 Test                     | real-time RT-PCR | Integrity Laboratories                                                          | nasopharyngeal, nasal and oropharyngeal swabs                                                                                              | N gene (N1, N2 regions)     |                                                                                            | United States |
| 54 | COV-19 IDx assay                    | real-time RT-PCR | Ipsium Diagnostics, LLC                                                         | nasopharyngeal and oropharyngeal swabs                                                                                                     | N gene                      |                                                                                            | United States |
| 55 | ProTect COVID-19 RT-qPCR Kit        | one-step RT-qPCR | JN Medsys Pte Ltd                                                               | sputum, nasopharyngeal and oropharyngeal swabs, and bronchoalveolar lavage fluid, tracheal aspirates, and serum                            | N gene (N1, N2, N3 regions) | results in < 2 hours                                                                       | Singapore     |
| 56 | PowerCheck T M2019-nCoV RT PCR kit  | real-time RT-PCR | Kogene Biotech                                                                  | respiratory samples                                                                                                                        | E and RdRP genes            |                                                                                            | South Korea   |
| 57 | Curative-Korva SARS-CoV-2 assay     | real-time RT-PCR | KorvaLabs Inc.                                                                  | nasopharyngeal, oropharyngeal, nasal swabs and oral fluid specimen                                                                         |                             |                                                                                            | United States |
| 58 | COVID-19 RT-PCR Test                | real-time RT-PCR | LabCorp Laboratory Corporation of America                                       | nasopharyngeal and oropharyngeal swabs/washes/aspirates and sputum and bronchoalveolar lavage fluid                                        | N gene                      | results in 2-4 days                                                                        | United States |
| 59 | Pixel, COVID-19 At Home Kit         | real-time RT-PCR | LabCorp Laboratory Corporation of America                                       | nasal swabs                                                                                                                                | N gene                      |                                                                                            | United States |

|    |                                                                                   |                                                          |                                                |                                                                                    |                                        |                                                                                              |                         |
|----|-----------------------------------------------------------------------------------|----------------------------------------------------------|------------------------------------------------|------------------------------------------------------------------------------------|----------------------------------------|----------------------------------------------------------------------------------------------|-------------------------|
| 60 | 1copy COVID-19 qPCR Kit                                                           | real-time RT-PCR                                         | Luminarie Canada Inc. (South Korea)/1Drop Inc. | swabs                                                                              | E and RdRP genes                       | results in < 2 hours, sensitivity- limit of detection 4 copies/reaction                      | Canada                  |
| 61 | ARIES SARS CoV-2 Assay                                                            | real-time RT-PCR                                         | Luminex Corporation                            | nasopharyngeal swabs                                                               | ORF1ab and N gene                      | minimal hands-on time and an automated workflow delivers results in ~ 2 hours                | United States           |
| 62 | NxTAG CoV Extended Panel Assay                                                    | RT-PCR                                                   | Luminex Molecular Diagnostics, Inc. (Canada)   | nasopharyngeal swabs                                                               | ORF1ab and E and N genes               | highly scalable, cost-effective solution that can process up to 96 samples in ~ 4 hours      | Canada<br>United States |
| 63 | SARS-CoV-2 fluorescent PCR Kit                                                    | real-time RT-PCR                                         | Maccura Biotechnology (USA) LLC                | upper respiratory tract specimens                                                  |                                        |                                                                                              | United States           |
| 64 | Nucleic Acid reagent test kit for novel coronavirus 2019-nCoV (fluorometric PCR)  | fluorometric PCR                                         | Maccura Biotechnology Co., Ltd                 | oropharyngeal swabs, sputum                                                        | ORF1ab and E and N genes               |                                                                                              | China                   |
| 65 | SARS-CoV-2 DETECTR                                                                | CRISPR-based lateral flow assay isothermal amplification | Mammoth Biosciences                            | respiratory samples                                                                | E and N genes                          | CRISPR Cas12a-based lateral flow assay results in 30-40 minutes                              | United States           |
| 66 | MGH COVID-19 qPCR assay                                                           | quantitative real-time RT-PCR                            | Massachusetts General Hospital                 | nasal, nasopharyngeal and oropharyngeal swabs and bronchoalveolar lavage specimens | N gene (N1 and N2 regions)             |                                                                                              | United States           |
| 67 | SARS-CoV-2 Molecular Detection Assay                                              | real-time RT-PCR                                         | Mayo Clinic Laboratories, Rochester, MN        | upper and lower respiratory specimens                                              | ORF1ab and N gene                      |                                                                                              | United States           |
| 68 | Accula SARSCov-2 Test                                                             | PCR and lateral flow technologies                        | Mesa Biotech Inc.                              | throat and nasal swabs specimens combined                                          | N gene                                 | results in 30 minutes, palm-sized device can be used in physician's office or patient's home | United States           |
| 69 | MiRXES FORTITUDE KIT 2.0                                                          | real-time RT-PCR                                         | MiRXES Pte Ltd                                 | nasopharyngeal swabs                                                               | viral RNA genes less prone to mutation | results in 90 minutes, 96 samples in one run, produces 100,000 test kits/wk                  | Singapore               |
| 70 | XGEN MASTER COVID-19 KIT - Master Kit for Detection of the SARS-CoV-2 Coronavirus | RT-quantitative PCR                                      | Mobius Life Science (Brazil)                   | nasal and oropharyngeal swabs                                                      | ORF1ab and N gene                      |                                                                                              | Brazil                  |

|    |                                                                               |                            |                                                       |                                                                                                  |                                                             |                                                                                                                   |               |
|----|-------------------------------------------------------------------------------|----------------------------|-------------------------------------------------------|--------------------------------------------------------------------------------------------------|-------------------------------------------------------------|-------------------------------------------------------------------------------------------------------------------|---------------|
| 71 | NeuMoDx SARS-CoV-2 Assay                                                      | real-time RT-PCR           | NeuMoDx Molecular, Inc.                               | nasopharyngeal, oropharyngeal and nasal swabs                                                    | N genes                                                     | results in ~ 1 hour                                                                                               | United States |
| 72 | New York SARS-CoV-2 Real-time Reverse Transcriptase (RT)-PCR Diagnostic Panel | real-time RT-PCR           | New York Department of Health                         | respiratory samples                                                                              |                                                             |                                                                                                                   | United States |
| 73 | SARS-CoV-2 Assay                                                              | real-time PCR              | Northwestern Medicine Diagnostic Molecular Laboratory | respiratory samples                                                                              |                                                             |                                                                                                                   | United States |
| 74 | Orig3n 2019 Novel Coronavirus (COVID-19) Test                                 | real-time RT-PCR           | Orig3n, Inc.                                          | oropharyngeal, nasopharyngeal, anterior nasal, and mid-turbinate nasal swabs                     | N gene (N1, N2 regions), N3 SARS-like coronavirus uses gene | results in 24-36 hours from receipt of specimens in Orig3n's Boston laboratory                                    | United States |
| 75 | GeneFinder COVID-19 Plus RealAmp Kit                                          | real-time RT-PCR           | OSANG Healthcare                                      | oropharyngeal, nasopharyngeal, nasal, mid-turbinate nasal swabs and bronchoalveolar lavage fluid | E, N and RdRP genes                                         |                                                                                                                   | United States |
| 76 | MOLECULAR SARS-CoV-2 (E/P1) kit                                               | real-time RT-PCR           | Oswaldo Cruz Foundation                               | nasopharyngeal aspirates and triple swabs                                                        | E, P1 and RdRP genes                                        |                                                                                                                   | Brazil        |
| 77 | PerkinElmer New Coronavirus Nucleic Acid Detection Kit                        | real-time RT-PCR           | PerkinElmer, Inc.                                     | oropharyngeal and nasopharyngeal swabs                                                           | ORF1ab and N gene                                           | detection limit = 20 copies/mL                                                                                    | United States |
| 78 | Primer design Ltd COVID19 genesig Real-Time PCR assay                         | real-time RT-PCR           | Primerdesign Ltd                                      | nasopharyngeal and oropharyngeal swabs, sputum                                                   | viral RNA                                                   |                                                                                                                   | United States |
| 79 | QIAstat-Dx Respiratory SARS-CoV-2 Panel                                       | multiplex real-time RT-PCR | Qiagen GmbH                                           | nasopharyngeal swabs                                                                             | E and RdRP genes                                            | results in ~ 1 hour, by differentiating novel coronavirus from 21 other bacterial and viral respiratory pathogens | United States |
| 80 | Quest SARSCoV-2 rRTPCR                                                        | real-time RT-PCR           | Quest Diagnostics Infectious Disease, Inc.            | nasopharyngeal and oropharyngeal swabs bronchoalveolar lavage fluid/wash,                        | viral RNA                                                   | results in < 2 days                                                                                               | United States |

|    |                                                                                      |                            |                                                                                             |                                                                                                                          |                          |                                                                                                                                       |                                                                      |
|----|--------------------------------------------------------------------------------------|----------------------------|---------------------------------------------------------------------------------------------|--------------------------------------------------------------------------------------------------------------------------|--------------------------|---------------------------------------------------------------------------------------------------------------------------------------|----------------------------------------------------------------------|
|    |                                                                                      |                            |                                                                                             | nasopharyngeal aspirate/wash, tracheal aspirate, or sputum sample                                                        |                          |                                                                                                                                       |                                                                      |
| 81 | Lyra SARS-CoV-2 Assay                                                                | real-time RT-PCR           | Quidel Corp.                                                                                | nasopharyngeal and oropharyngeal swabs                                                                                   | pp1ab                    | results in < 75 minutes after extraction                                                                                              | United States                                                        |
| 82 | Cobas SARS-CoV-2                                                                     | real-time RT-PCR           | Roche Molecular Systems, Inc. Roche Diagnostics K.K. Roche Diagnostics Asia Pacific Pte Ltd | nasopharyngeal and oropharyngeal swabs                                                                                   | viral RNA                | results in ~ 3.5 hours, instruments can process up to 384 results (cobas 6800 System) and 1056 results (cobas 8800 System) in 8 hours | Australia<br>Brazil<br>Canada<br>Japan<br>Singapore<br>United States |
| 83 | ThermoFisher - Applied Biosystems TaqPath COVID-19 Combo Kit                         | multiplex real-time RT-PCR | Rutgers Clinical Genomics Laboratory- Rutgers University                                    | oropharyngeal, nasopharyngeal, anterior nasal, mid-turbinate nasal swabs and saliva specimens                            | ORF1ab and N and S genes |                                                                                                                                       | United States                                                        |
| 84 | Novel Coronavirus (2019-nCoV) Nucleic Acid Diagnostic Kit (PCR-Fluorescence probing) | real-time RT-PCR           | Sansure Biotech Inc.                                                                        | nasopharyngeal and oropharyngeal swab, serum, blood and feces                                                            | ORF1ab and N gene        | results in 30 minutes                                                                                                                 | China                                                                |
| 85 | ScienCell SARS-CoV-2 Coronavirus Real-time RT-PCR (RTqPCR) Detection Kit             | real-time RT-PCR           | ScienCell Research Laboratories                                                             | nasopharyngeal and oropharyngeal aspirates/swabs/washes and bronchoalveolar lavage fluid, tracheal aspirates, and sputum | N gene                   |                                                                                                                                       | United States                                                        |
| 86 | STANDARD M nCoV RT Detection kit                                                     | real-time RT-PCR           | SD BIOSENSOR                                                                                | oropharyngeal swabs                                                                                                      | E and RdRP genes         | results within 90 minutes                                                                                                             | South Korea<br>United States                                         |
| 87 | Allplex 2019-nCoV Assay                                                              | multiplex real-time RT-PCR | Seegene                                                                                     | nasopharyngeal, nasopharyngeal aspirates, throat swabs, and bronchoalveolar lavage fluid                                 | E, N and RdRP genes      | results in < 2 hours after extraction                                                                                                 | Australia<br>South Korea<br>Singapore                                |
| 88 | Nucleic Acid reagent test kit for novel coronavirus 2019-nCoV (fluorometric PCR)     | fluorometric PCR           | Shanghai BioGerm Medical Biotechnology Co., Ltd                                             | nasopharyngeal and oropharyngeal swabs, and sputum                                                                       | ORF1ab and N gene        |                                                                                                                                       | China                                                                |

|    |                                                                                          |                            |                                                                 |                                                                          |                          |                                                          |               |
|----|------------------------------------------------------------------------------------------|----------------------------|-----------------------------------------------------------------|--------------------------------------------------------------------------|--------------------------|----------------------------------------------------------|---------------|
| 89 | Nucleic Acid reagent test kit for novel coronavirus 2019-nCoV (fluorometric PCR)         | fluorometric PCR           | Shanghai Fosun Long March Medical Science Co., Ltd.             | oropharyngeal swabs, sputum                                              | ORF1ab and E and N genes | results for 96 samples within 2 hours                    | China         |
| 90 | Nucleic Acid reagent test kit for novel coronavirus 2019-nCoV (fluorometric PCR)         | fluorometric PCR           | Shanghai GeneDx Biotechnology Co., Ltd<br>Also known as GeneDx  | nasopharyngeal swabs, sputum                                             | ORF1ab and N gene        |                                                          | China         |
| 91 | Nucleic Acid reagent test kit for novel coronavirus 2019-nCoV (RNA capture probe method) | RNA capture probe method   | Shanghai Rendu Biotechnology Co., Ltd                           | oropharyngeal swabs, sputum                                              | ORF1ab                   | results within 90 minutes                                | China         |
| 92 | Novel Coronavirus (2019-nCoV) Real Time Multiplex RT-PCR Kit                             | multiplex real-time RT PCR | Shanghai ZJ Bio-Tech Co. Ltd (China)<br>Also known as LifeRiver | nasopharyngeal extracts, deep cough sputum, bronchoalveolar lavage fluid | E, N and RdRP genes      | results within 15 minutes                                | Australia     |
| 93 | Nucleic Acid reagent test kit for novel coronavirus 2019-nCoV (fluorometric PCR)         | fluorometric PCR           | Shanghai ZJ Bio-Tech Co., Ltd.                                  | oropharyngeal swabs, sputum, bronchoalveolar lavage fluid                | ORF1ab and E and N genes | rapid pathogen detection                                 | China         |
| 94 | DiaPlexQ Novel Coronavirus (2019-nCoV) Detection Kit                                     | real-time RT-PCR           | SolGent Co., Ltd (represented by JK Toxpert) (South Korea)      | nasopharyngeal and oropharyngeal swabs, sputum                           | E and RdRP genes         | results within 2 hours after extracting RNA              | Canada        |
| 95 | DiaPlexQ TMN Coronavirus Detection kit                                                   | real-time RT-PCR           | SolGent Co.,Ltd.                                                | nasopharyngeal and oropharyngeal swabs, sputum                           | Orf1a and N gene         | results within ~120 minutes                              | South Korea   |
| 96 | COVID-19 Key Assay                                                                       | real-time RT-PCR           | Southwest Regional PCR laboratory LLC<br>MicroGen DX            | nasal, nasopharyngeal, mid-turbinate, oropharyngeal swabs and sputum     | N gene (N, N2 regions)   |                                                          | United States |
| 97 | Cepheid Xpert Xpress SARSCoV-2                                                           | real-time RT-PCR           | SPD Scientific Pte Ltd                                          | nasopharyngeal, nasal, and mid-turbinate swabs                           | N2 and E genes           | results with ~ 45 minutes, with < 1 minute hands-on time | Singapore     |
| 98 | SDI SARS-CoV-2 Assay                                                                     | real-time RT-PCR           | Specialty Diagnostic (SDI) Laboratories                         | nasopharyngeal and oropharyngeal swabs                                   | ORF1ab                   |                                                          | United States |
| 99 | Stanford SARS-CoV-2 assay                                                                | RT-PCR                     | Stanford Health Care Clinical Virology Laboratory               | nasopharyngeal swabs                                                     | N gene                   | results able to test 2,000/day                           | United States |

|     |                                                                                                                     |                                                     |                                                                         |                                                                                                                                    |                          |                                                                                                                                                          |                                                             |
|-----|---------------------------------------------------------------------------------------------------------------------|-----------------------------------------------------|-------------------------------------------------------------------------|------------------------------------------------------------------------------------------------------------------------------------|--------------------------|----------------------------------------------------------------------------------------------------------------------------------------------------------|-------------------------------------------------------------|
| 100 | 2019-nCoV Fluorescence Detection                                                                                    | fluorescence combined with real-time RT-PCR         | Sysmex Corporation                                                      | throat swabs and bronchoalveolar lavage fluid                                                                                      | ORF1ab region            |                                                                                                                                                          | Japan                                                       |
| 101 | TaqPath COVID-19 Combo Kit                                                                                          | multiplex real-time RT-PCR                          | Thermo Fisher Scientific, Inc. (USA) Life Technologies Holdings Pte Ltd | nasopharyngeal swabs, nasopharyngeal aspirate (nasal aspirate), and bronchoalveolar lavage fluid                                   | ORF1ab and N and S genes | complete workflow from viral RNA extraction from up to 94 specimens and genetic analysis using real-time PCR to generate diagnostic report under 3 hours | Australia<br>Canada<br>Singapore<br>Taiwan<br>United States |
| 102 | Phoenix Dx 2019-CoV                                                                                                 | real-time RT-PCR                                    | Trax Management Services, Inc.                                          | nasal, nasopharyngeal and oropharyngeal swabs, and bronchoalveolar lavage fluid                                                    | E and N genes            |                                                                                                                                                          | United States                                               |
| 103 | UDX SARS-CoV-2 Molecular Assay                                                                                      | real-time RT-PCR                                    | Ultimate Dx Corp                                                        | nasal, nasopharyngeal and oropharyngeal swabs                                                                                      | ORF1ab                   |                                                                                                                                                          | United States                                               |
| 104 | UNC Health SARS-CoV-2 real-time RT-PCR test                                                                         | real-time RT-PCR                                    | University of North Carolina Medical Center                             | nasopharyngeal and oropharyngeal specimens, tracheal aspirates, bronchoalveolar lavage fluid and nasopharyngeal aspirates/washings | E gene                   | testing is limited to university lab, 24-hour turn-around                                                                                                | United States                                               |
| 105 | Nucleic Acid reagent test kit for novel coronavirus 2019-nCoV (Isothermal amplification real time fluorometric PCR) | isothermal amplification real-time fluorometric PCR | Ustar Biotechnologies (Hangzhou) Ltd.                                   | oropharyngeal swabs, sputum                                                                                                        | ORF1ab and N gene        |                                                                                                                                                          | China                                                       |
| 106 | VereCoV Detection Kit                                                                                               | multiplex RT-PCR combined with microarray           | Veredus Laboratories Pte Ltd                                            | nasopharyngeal, nasal, throat swabs and throat aspirates                                                                           | ORF1ab and N and S genes | results in ~ 2 hours after extraction, lab-on-chip platform                                                                                              | Singapore                                                   |
| 107 | Viracor SARS-CoV-2 assay                                                                                            | real-time RT-PCR                                    | Viracor Eurofins Clinical Diagnostics                                   | nasopharyngeal, nasal, oropharyngeal washes/swabs and bronchoalveolar lavage fluid                                                 | N gene                   | results the same day, 12-18 hours from receipt of specimen                                                                                               | United States                                               |

|     |                                                                                                                 |                                                 |                                                       |                                                |                        |                            |               |
|-----|-----------------------------------------------------------------------------------------------------------------|-------------------------------------------------|-------------------------------------------------------|------------------------------------------------|------------------------|----------------------------|---------------|
| 108 | New York SARS-CoV-2 Real-time Reverse Transcriptase (RT)-PCR Diagnostic Panel                                   | real-time RT-PCR                                | Wadsworth Center, NYSDOH                              | nasopharyngeal/ oropharyngeal swabs and sputum | Various genes          |                            | United States |
| 109 | Nucleic Acid reagent test kit for novel coronavirus 2019-nCoV (fluorometric PCR)                                | fluorometric PCR                                | Wuhan Easy Diagnosis Biomedicine Co., Ltd.            | oropharyngeal and nasopharyngeal swabs, sputum | ORF1ab and N gene      | rapid pathogen detection   | China         |
| 110 | Nucleic Acid reagent test kit for novel coronavirus 2019-nCoV (RNA isothermal amplification lateral flow assay) | RNA isothermal amplification lateral flow assay | Wuhan Zhongzhi Biotechnologies Inc.                   | oropharyngeal swabs, sputum                    | ORF1ab and E gene      |                            | China         |
| 111 | Nucleic Acid reagent test kit for novel coronavirus 2019-nCoV (Dual amplification)                              | RNA isothermal amplification lateral flow assay | Wuhan Zhongzhi Biotechnologies Inc.                   | oropharyngeal swabs, sputum                    | ORF1ab and E gene      | rapid pathogen detection   | China         |
| 112 | SARS-CoV-2 PCR test                                                                                             | real-time RT-PCR                                | Yale New Haven Hospital, Clinical Virology Laboratory | respiratory swabs                              | N gene (N, N2 regions) | can complete 500 tests/day | United States |

**Table S2. Examples for serological and immunological diagnostic tests for the detection of viral proteins or antibodies to SARS-CoV-2 virus<sup>9-11</sup>**

| No. | Test Name                                                                                                 | Test Type                                             | Manufacturer/ Organization Name                                | Sample Source            | Ig or Protein detected                     | Test result time/ Additional Information | Country of approval |
|-----|-----------------------------------------------------------------------------------------------------------|-------------------------------------------------------|----------------------------------------------------------------|--------------------------|--------------------------------------------|------------------------------------------|---------------------|
| 1   | m2000 SARS-CoV-2                                                                                          | chemiluminescent microparticle immunoassay            | Abbott Laboratories Core Laboratory                            | serum/plasma/whole blood | IgG                                        | runs up to 100-200 test/hour             | United States       |
| 2   | COVID-19 IgG/IgM LF                                                                                       | lateral flow immunoassay                              | Advagen Biotech                                                | serum/plasma/whole blood | IgG/IgM                                    | results in 10 minutes                    | Brazil              |
| 3   | RapCov™ Rapid COVID-19 Test                                                                               | lateral flow immunoassay                              | Advaita                                                        | blood sample             | IgG/IgM                                    | research use only                        | United States       |
| 4   | COVID-19 IgG/IgM Point of Care Rapid test                                                                 | lateral flow immunoassay                              | Aytu Biosciences/Orient Gene Biotech                           | serum/plasma/whole blood | IgG/IgM                                    | results in 2-10 minutes                  | China United States |
| 5   | Wantai SARS-CoV-2                                                                                         | chromatographic lateral flow assay                    | Beijing Wantai Biological Pharmacy                             | serum/plasma/whole blood | N protein, S1 and S2 subunits of S protein | results in 15 minutes                    | Australia           |
| 6   | Wantai SARS-CoV-2 Ab Rapid Test kit                                                                       | ELISA                                                 | Beijing Wantai Biological Pharmacy Enterprise Co. Ltd. (China) | serum/whole blood        | IgG/IgM                                    |                                          | Australia           |
| 7   | OnSite COVID-19 IgG/IgM Rapid Test                                                                        | lateral flow immunoassay                              | Bio Advance Diagnostics                                        | serum/plasma/whole blood | IgG/IgM                                    | results in 15 minutes                    | Brazil              |
| 8   | Nanjing Vazyme 2019-nCoV IgG/IgM Detection Kit also marketed as Biolidics 2019-nCoV IgG/IgM Detection Kit | lateral flow immunoassay                              | Biolidics Limited                                              | serum/plasma/whole blood | IgG/IgM                                    | results within 10 minutes                | Singapore           |
| 9   | COVID-19 IgM/IgG Rapid Test                                                                               | lateral flow immunoassay                              | BioMedomics                                                    | serum/plasma/whole blood | IgG/IgM                                    | results within 15 minutes                | United States       |
| 10  | IgG Antibody test kit for novel coronavirus 2019-nCoV                                                     | magnetic particle-based chemiluminescence immunoassay | Bioscience (Chongqing) Diagnostic Technology Co., Ltd.         | serum                    | IgG                                        |                                          | China               |
| 11  | IgM Antibody test kit for novel coronavirus 2019-nCoV                                                     | magnetic particle-based chemiluminescence immunoassay | Bioscience (Chongqing) Diagnostic Technology Co., Ltd.         | serum                    | IgM                                        |                                          | China               |



|    |                                                  |                                               |                                       |                          |               |                                               |                            |
|----|--------------------------------------------------|-----------------------------------------------|---------------------------------------|--------------------------|---------------|-----------------------------------------------|----------------------------|
| 12 | SARS-CoV-2 IgG/IgM kit                           | colloidal gold lateral flow immunoassay       | Biotime                               | serum/plasma/whole blood | IgG/IgM       | results within 10-15 minutes                  | China                      |
| 13 | One Step COVID-2019 Test                         | lateral flow immunoassay                      | Celer Biotechnologia                  | serum/plasma/whole blood | IgG/IgM       | results in 15 minutes                         | Brazil                     |
| 14 | qSARS-CoV-2 IgG/IgM Rapid Test                   | lateral flow immunoassay                      | Cellex Inc.                           | serum/plasma/whole blood | IgG/IgM       | results in 15-20 minutes                      | Australia<br>United States |
| 15 | COVID-19 IgG/IgM                                 | lateral flow immunoassay                      | Cepalab Laboratorios Ltda             | serum/plasma/whole blood | IgG/IgM       |                                               | Brazil                     |
| 16 | DPP COVID-19 IgM/IgG System                      | lateral flow immunoassay                      | ChemBio Diagnostics                   | serum/plasma/whole blood | IgG/IgM       | results within 15 minutes                     | Brazil                     |
| 17 | COVID-19 Ag Respi-Strip                          | lateral flow immunoassay (dipstick)           | Coris Bioconcept                      | nasal mucus swabs        | viral antigen | results in 15 minutes                         | Belgium                    |
| 18 | DEIASL019 SARS-CoV-2 IgG ELISA kit               | ELISA                                         | Creative Diagnostics                  | serum/plasma             | IgG           | tests for patients IgG specific for N protein | United States              |
| 19 | DEIASL020 SARS-CoV-2 IgM ELISA kit               | ELISA                                         | Creative Diagnostics                  | serum/plasma             | IgM           |                                               | United States              |
| 20 | OnSite COVID-19 IgG/IgM Rapid Test               | lateral flow immunoassay                      | CTK Biotech Inc. (USA)                | serum/plasma/whole blood | IgG/IgM       | results in 10 minutes                         | Australia                  |
| 21 | CORONAVIR US RAPID TEST                          | lateral flow immunoassay                      | Diagnostica Industria E Comercio Ltda | serum/plasma/whole blood | IgG/IgM       | results within 15 minutes                     | Brazil                     |
| 22 | Diazyme DZ-Lite SARS-CoV-2 IgG test              | luminescent immunoassay                       | Diazyme Laboratories                  | blood sample             | IgG           |                                               | United States              |
| 23 | Diazyme SARS-CoV-2 IgM CLIA test                 | luminescent immunoassay                       | Diazyme Laboratories                  | blood sample             | IgM           |                                               | United States              |
| 24 | 2019 nCoV IgG/IgM Rapid test DNK-1419-1          | lateral flow immunoassay                      | Dynamiker                             | serum/plasma/whole blood | IgG/IgM       | NMPA approved, reaction time 10 minutes       | China                      |
| 25 | Coronavirus COVID-19 IgG ELISA Assay Kit KT-1032 | ELISA                                         | Eagle Biosciences                     | serum                    | IgG           | incubation time of 1.5 hours                  | United States              |
| 26 | Coronavirus COVID-19 IgM ELISA Assay Kit KT-1033 | ELISA                                         | Eagle Biosciences                     | serum                    | IgM           | incubation time of 1.5 hours                  | United States              |
| 27 | CORONAVIR US IgG/IgM (COVID-19)                  | chromatographic rapid qualitative immunoassay | Ebram Productos Laboratoriais         | serum/plasma/whole blood | IgG/IgM       | results in 10-20 minutes                      | Brazil                     |
| 28 | COVID-19 IgG/IgM ECO Test                        | chromatographic rapid                         | Eco Diagnostica Ltda                  | serum/plasma/whole blood | IgG/IgM       | results in 10-15 minutes                      | Brazil                     |

|    |                                                                           |                                                          |                                    |                                       |                    |                                                                                                   |               |
|----|---------------------------------------------------------------------------|----------------------------------------------------------|------------------------------------|---------------------------------------|--------------------|---------------------------------------------------------------------------------------------------|---------------|
|    |                                                                           | qualitative immunoassay                                  |                                    |                                       |                    |                                                                                                   |               |
| 29 | COVID-19 Ag ECO Test                                                      | Immunoassay                                              | Eco Diagnostica Ltda               | nasopharyngeal or oropharyngeal swab  | SARS-CoV-2 antigen | results in 10-15 minutes                                                                          | Brazil        |
| 30 | ECO F COVID-19 Ag                                                         | fluorescent immunoassay                                  | Eco Diagnostica Ltda               | nasopharyngeal or oropharyngeal swabs | SARS-CoV-2 antigen |                                                                                                   | Brazil        |
| 31 | COVID-19 Ag ECO Teste                                                     | immunochromatographic assay enhanced with colloidal gold | Eco Diagnostica Ltda               | nasopharyngeal or oropharyngeal swabs | SARS-CoV-2 antigen | results in 10-15 minutes                                                                          | Brazil        |
| 32 | KT-1032 EDI Novel Coronavirus COVID-19 ELISA Kit                          | ELISA                                                    | Epitope Diagnostics                | serum                                 | IgG/IgM            |                                                                                                   | United States |
| 33 | KT-1033 EDI Novel Coronavirus COVID-19 ELISA Kit                          | ELISA                                                    | Epitope Diagnostics                | serum                                 | IgG/IgM            |                                                                                                   | United States |
| 34 | Anti-SARSCoV-2 ELISA IgA EI 2606-9601 A                                   | ELISA                                                    | EUROIMMUN                          | blood serum or plasma                 | IgA                | results in several hours                                                                          | Brazil        |
| 35 | Anti-SARSCoV-2 IgG ELISA EI 2606-9601 G                                   | ELISA                                                    | EUROIMMUN                          | blood serum or plasma                 | IgG                | results in several hours                                                                          | Brazil        |
| 36 | VivaDiag COVID-19 IgM/IgG Rapid Test                                      | lateral flow immunoassay                                 | Everest Links Pte Ltd.             | serum/plasma/whole blood              | IgG/IgM            | results in 15 minutes                                                                             | Singapore     |
| 37 | FIA COVID-19 IgM/IgG (COVI025)                                            | lateral flow immunoassay                                 | GenBody                            | blood sample                          | IgG/IgM            | research use only, results within 15 minutes                                                      | South Korea   |
| 38 |                                                                           |                                                          | Gold Standard Diagnostics          |                                       |                    |                                                                                                   |               |
| 39 |                                                                           | lateral flow immunoassay                                 | Guangdong Hecin                    | serum/blood                           | IgM                | NMPA approved                                                                                     | China         |
| 40 | Wondfo SARS-CoV-2 Antibody Test (Lateral Flow Method)                     | lateral flow immunoassay                                 | Guangzhou Wondfo Biotech Co., Ltd. | serum/blood                           | IgG/IgM            | approved for diagnosis                                                                            | China         |
| 41 | Antibody test kit for novel coronavirus 2019-nCoV (colloidal gold method) | Immunoassay                                              | Guangzhou Wondfo Biotech Co., Ltd. | serum/plasma/whole blood              | IgG/IgM            | no distinguishing between IgM and IgG                                                             | China         |
| 42 | Finecare SARS-CoV-2 Antibody Test                                         | Immunoassay                                              | Guangzhou Wondfo Biotech Co., Ltd. | serum/blood                           | IgG/IgM            | using with Finecare series, multiple parameters can be detected simultaneously, such as CRP, PCT, | China         |

|    |                                                                                |                                          |                                                            |                                                  |         |                                                          |               |
|----|--------------------------------------------------------------------------------|------------------------------------------|------------------------------------------------------------|--------------------------------------------------|---------|----------------------------------------------------------|---------------|
|    |                                                                                |                                          |                                                            |                                                  |         | SAA, IL-6, Myo, cTn I, cTn T, D-dimer                    |               |
| 43 | 2019-n-CoV IgG/IgM Rapid Test Cassette                                         | lateral flow immunoassay                 | Hangzhou Alltest Biotech Co. Ltd. (China)                  | serum/whole blood                                | IgG/IgM | results in 15-20 minutes                                 | Australia     |
| 44 | COVID-19 IgG/IgM Rapid Test Cassette                                           | lateral flow immunoassay                 | Hangzhou Biotest Biotech Co. Ltd. (China)                  | serum/whole blood                                | IgG/IgM | results in 15-20 minutes                                 | Australia     |
| 45 | COVID-19 IgG/IgM Rapid Test Cassette                                           | lateral flow immunoassay                 | Hangzhou Clonegene Biotech Co. Ltd. (China)                | serum/plasma/whole blood                         | IgG/IgM | results in 10-15 minutes per test                        | Australia     |
| 46 | Novel Coronavirus (2019-nCoV) IgM/IgG Antibody Combo Test                      | lateral flow immunoassay                 | Hangzhou Laihe Biotech Co. Ltd. (China)                    | serum/whole blood                                | IgG/IgM | results in 15 minutes                                    | Australia     |
| 47 | Novel Coronavirus (2019-nCoV) IgM/IgG Antibody Combo Test Kit (Colloidal Gold) | lateral flow immunoassay                 | Hangzhou Laihe Biotech Co. Ltd. (China)                    | whole blood, serum, plasma or cell culture media | IgG/IgM |                                                          | Australia     |
| 48 | One Step SARS-CoV-2 (COVID-19) IgG/IgM Test                                    | lateral flow chromatographic immunoassay | Hangzhou Testsealabs Biotechnology                         | serum/plasma/whole blood                         | IgG/IgM | results in 15 minutes                                    | China         |
| 49 | COVID-19 IgG/IgM Rapid Test Cassette (Whole Blood/Serum/Plasma)                | lateral flow immunoassay                 | Healgen Scientific                                         | serum/plasma/whole blood                         | IgG/IgM | results in 10 minutes, do not interpret after 15 minutes | United States |
| 50 | IgM antibody test kit for novel coronavirus 2019-nCoV (colloidal gold method)  | Immunoassay                              | Hecin Scientific, Inc.                                     | serum/plasma                                     | IgM     |                                                          | China         |
| 51 | 2019-nCoV Ab Test (Colloidal Gold)                                             | lateral flow immunoassay                 | Innovita (Tangshan) Biological Technology Co. Ltd. (China) | serum/whole blood                                | IgG/IgM | results between 10-20 minutes                            | Australia     |
| 52 | Antibody test kit for novel coronavirus 2019-nCoV (colloidal gold method)      | immunoassay                              | Innovita (Tangshan) Biological Technology Co., Ltd.        | serum/plasma/blood                               | IgG/IgM | results in 15 minutes                                    | China         |

|    |                                                                                   |                                     |                                             |                          |                |                                                               |                |
|----|-----------------------------------------------------------------------------------|-------------------------------------|---------------------------------------------|--------------------------|----------------|---------------------------------------------------------------|----------------|
| 53 | Novel Coronavirus (SARS-CoV-2) IgM/IgG Rapid Test Kit                             | lateral flow immunoassay            | Jiangsu bioPerfectus Technologies           | blood sample             | IgG/IgM        |                                                               | China          |
| 54 | Novel Corona Virus (SARS-CoV-2) Ag Rapid Test Kit                                 | ELISA                               | Jiangsu bioPerfectus Technologies           | nasal swabs              | viral proteins |                                                               | China          |
| 55 | SARS-CoV-2 rapid IgG-IgM combined antibody test                                   | lateral flow immunoassay            | Jiangsu Medomics Medical Technologies       | blood sample             | IgG/IgM        | results in 15 minutes                                         | China          |
| 56 | Anti COVID19 IgG/IgM Rapid Test                                                   | Immunoassay                         | Labtest Diagnostica S.A.                    |                          | IgG/IgM        |                                                               | Brazil         |
| 57 | COVID-19 IgG/IgM Combo Rapid Test Device                                          | lateral flow immunoassay            | Liming Bio                                  | serum/plasma/blood       | IgG/IgM        |                                                               | China          |
| 58 | COVID-19 Antibody test IgM/IgG                                                    | lateral flow immunoassay            | Livzon Diagnostics                          | serum/plasma/blood       | IgG/IgM        | antibodies specific to N protein, results by 15 minutes       | China          |
| 59 | LUMIRATEK COVID-19 (IgG/IgM)                                                      | Immunoassay                         | LumiraDX Healthcare Ltda                    |                          | IgG/IgM        |                                                               | Brazil         |
| 60 |                                                                                   | ELISA                               | Mayo Clinic University of Minnesota         |                          |                | for clinical use                                              | United States  |
| 61 | Coronavirus Disease 2019 Antibody (IgM/IgG) Combined Test Kit                     | lateral flow immunoassay            | Medical Systems Biotechnology               | serum/plasma/whole blood | IgG/IgM        | results within 5-10 minutes                                   | China          |
| 62 |                                                                                   | lateral flow immunoassay            | Mologic                                     |                          |                |                                                               | United Kingdom |
| 63 | COVID-19 ELISA IgG Antibody Test                                                  | ELISA                               | Mount Sinai Labs                            | serum/plasma             | IgG            | plates coated with receptor-binding domain (RBD) of S protein | United States  |
| 64 | SARS-CoV-2 IgM/IgG Antibody Rapid Test Kit                                        |                                     | Nanjing Liming Bioproducts Co. Ltd.         | blood samples            | IgG/IgM        |                                                               | China          |
| 65 | IgM/IgG antibody test kit for novel coronavirus 2019-nCoV (colloidal gold method) | colloidal gold immunochromatography | Nanjing Vazyme Medical Technology Co., Ltd. | blood serum/plasma       | IgG/IgM        | results in 10 minutes                                         | China          |
| 66 | NanoMedicina SARS-CoV-2 IgM/IgG Antibody Rapid Test                               |                                     | NanoResearch                                | blood samples            | IgG/IgM        |                                                               |                |

|    |                                                                       |                                      |                                          |                          |                    |                                                                              |               |
|----|-----------------------------------------------------------------------|--------------------------------------|------------------------------------------|--------------------------|--------------------|------------------------------------------------------------------------------|---------------|
| 67 | (2019-nCoV) New coronavirus Antibody Test (Colloidal Gold)            |                                      | Nantong Diagnos Biotechnology            | blood samples            |                    |                                                                              | China         |
| 68 | pGOLD COVID-19 High Accuracy IgG/IgM assay kits                       | colloidal gold immunochrom atography | Nirmidas Biotech, Inc.                   | serum/plasma/whole blood | IgG/IgM/Ig A       | results ~ 2 hours, can run 48 samples with controls in each run              | United States |
| 69 | COVID-19 (SARS-CoV-2) IgM/IgG Antibody Detection Kit                  | colloidal gold immunochrom atography | Nirmidas Biotech, Inc.                   | serum/plasma/whole blood | IgG/IgM            | results within 15 minutes                                                    | United States |
| 70 | VITROS-Immunodiagn ostics Products Anti-SARS-CoV-2 Total Reagent Pack | ELISA                                | Ortho-Clinical Diagnostics               | blood serum/plasma       | IgG/IgM            | can't distinguish between IgG/IgM                                            | United States |
| 71 | VITROS immunodiagn ostic products Anti-SARS-CoV-2 IgG Reagent pack    | ELISA                                | Ortho-Clinical Diagnostics               | blood serum/plasma       | IgG                |                                                                              | United States |
| 72 | TR DPP COVID-19 IGM/IGG - BioManguinho                                | Immunochrom atography                | Oswaldo Cruz Foundation                  | whole blood              | IgG/IgM            |                                                                              | Brazil        |
| 73 | CANARY Biosensor                                                      | Immunosensor                         | Path sensors                             | environment/air          | SARS-CoV-2 antigen | results < 5 minutes                                                          | United States |
| 74 | COVID19 IgG/IgM Rapid Gold                                            |                                      | PCL Inc.                                 |                          | IgG/IgM            |                                                                              |               |
| 75 | COVID19 IgG/IgM Rapid Test                                            | lateral flow immunoassay             | Phamatech                                | serum/plasma/whole blood | IgG/IgM            | results in 10 minutes                                                        | United States |
| 76 | SARS-COV-2 Rapid Test                                                 | lateral flow immunoassay             | PharmACT                                 | whole blood/serum        | IgG/IgM            | results after 20 minutes, N protein, and S1 and S2 subunits used as antigens | Germany       |
| 77 | COVID-19 IgG/IgM Rapid Test Cassette                                  | lateral flow immunoassay             | Premier Biotech                          | blood sample             | IgG/IgM            | results in 10 minutes and remain valid for 20 minutes                        | United States |
| 78 | SARS-CoV-2 IgM/IgG Antibody Rapid Test                                | lateral flow immunoassay             | Qingdao Hightop Biotech Co. Ltd. (China) | serum/whole blood        | IgG/IgM            |                                                                              | Australia     |
| 79 | SARS-CoV-2 IgM/IgG                                                    | lateral flow immunoassay             | Qingdao Hightop Biotech Co. Ltd. (China) | serum/whole blood        | IgG/IgM            |                                                                              | Australia     |

|    |                                                                           |                                         |                                                            |                                |               |                                  |                     |
|----|---------------------------------------------------------------------------|-----------------------------------------|------------------------------------------------------------|--------------------------------|---------------|----------------------------------|---------------------|
|    | Antibody Rapid Test                                                       |                                         |                                                            |                                |               |                                  |                     |
| 80 | COVID-19 IgG/IgM Rapid Test (total blood/serum/plasma)                    | lateral flow immunoassay                | QR Consulting, Import and Distribution of Medical products | blood/serum/plasma             | IgG/IgM       | results within 15 minutes        | Brazil              |
| 81 | 2019-nCoV IgG/IgM Cassette Rapid Test (blood/serum/plasma)                | lateral flow immunoassay                | QR Consulting, Import and Distribution of Medical products | blood/serum/plasma             | IgG/IgM       | results within 15 minutes        | Brazil              |
| 82 | Coronavirus (COVID-19) IgM/IgG Rapid test                                 | lateral flow immunoassay                | RayBiotech                                                 | serum/whole blood              | IgG/IgM       | antibodies specific to N protein | United States       |
| 83 | SARS-CoV-2 Antibody Test Strip                                            | colloidal gold lateral flow immunoassay | Sannuo Biotech (Sinocare)                                  | blood/serum/plasma             | IgG/IgM       | results within 15-20 minutes     | China               |
| 84 | Standard Q COVID-19 IgM/IgG Duo                                           | lateral flow immunoassay                | SD BIOSENSOR                                               | blood/serum/plasma             | IgG/IgM       | results within 10 minutes        | South Korea         |
| 85 | Standard Q COVID-19 Ag                                                    | chromatographic immunoassay             | SD BIOSENSOR                                               | nasopharyngeal swabs           | viral antigen | results within 30 minutes        | South Korea         |
| 86 | Standard F COVID-19 Ag FIA                                                | fluorescent immunoassay                 | SD BIOSENSOR                                               | nasopharyngeal swabs           | N protein     | results within 30 minutes        | South Korea         |
| 87 | Covid-19 Rapid IgG/IgM combined with Antibody assay Prescreening test kit | lateral flow immunoassay                | sensing.self                                               | serum/whole blood              | IgG/IgM       | designed for home use            | Singapore           |
| 88 | BIOEASY 2019-nCoV IgG/IgM GICA Rapid test                                 | lateral flow immunoassay                | Shenzhen Bioeasy Biotechnology Co., Ltd.                   | serum/whole blood              | IgG/IgM       |                                  | China United States |
| 89 | BIOEASY 2019-nCoV IgG/IgM Ab GICA Rapid test                              | colloidal gold enhanced immunoassay     | Shenzhen Bioeasy Biotechnology Co., Ltd.                   | serum/whole blood              | IgG/IgM       |                                  | China United States |
| 90 | BIOEASY 2019-Novel Coronavirus (2019-nCoV) Fluorescence Ag Rapid Test     | Immunoassay                             | Shenzhen Bioeasy Biotechnology Co., Ltd.                   | oropharyngeal swabs and sputum | viral antigen |                                  | China United States |
| 91 | COVID-19 IgG/IgM Rapid Test Device                                        |                                         | Shenzhen Landwind Medical                                  |                                |               |                                  |                     |
| 92 | iFLASH-SARS-CoV-2-IgG                                                     | Immunoassay                             | Shenzhen Yhlo Biotech Company                              | blood/serum/plasma             | IgG           |                                  | China               |

|     |                                                                                                |                                              |                                               |                              |                              |                                                                          |                     |
|-----|------------------------------------------------------------------------------------------------|----------------------------------------------|-----------------------------------------------|------------------------------|------------------------------|--------------------------------------------------------------------------|---------------------|
| 93  | iFLASH-SARS-CoV-2-IgM                                                                          | Immunoassay                                  | Shenzhen Yhlo Biotech Company                 | blood/serum/plasma           | IgM                          |                                                                          | China               |
| 94  | MAGLUMI IgG de 2019-nCoV                                                                       | chemiluminescence immunoassay                | Snibe Diagnostic (China)                      | whole blood                  | IgG                          | results-600 tests per hour                                               | Brazil              |
| 95  | MAGLUMI IgM de 2019-nCoV                                                                       | chemiluminescence immunoassay                | Snibe Diagnostic (China)                      | whole blood                  | IgM                          | results-600 tests per hour                                               | Brazil              |
| 96  | MAGLUMI IgM de 2019-nCoV (CLIA)                                                                | chemiluminescence immunoassay                | Snibe Diagnostic (China)                      | blood serum/plasma           | IgM                          | results in 30 minutes                                                    | Brazil              |
| 97  | MAGLUMI IgG de 2019-nCoV (CLIA)                                                                | chemiluminescence immunoassay                | Snibe Diagnostic (China)                      | blood serum/plasma           | IgG                          | results in 30 minutes                                                    | Brazil              |
| 98  | Rapid SARS-CoV-2 antigen detection test                                                        | antigen-based LFIA                           | Sona Nanotech                                 | nasal or oropharyngeal swabs | S1 domain of Spike protein   |                                                                          | Canada Nova Scotia  |
| 99  | SGTi-flex COVID-19 IgM/IgG                                                                     | gold nanoparticle-based immunochromatography | Sugentech                                     | whole blood/serum/plasma     | IgG/IgM                      | results in 10-15 minutes                                                 | South Korea         |
| 100 | SARS-CoV-2 IgM/IgG Antibody Rapid Test VC012103                                                | lateral flow immunoassay                     | Sure Biotech                                  | whole blood/serum/plasma     | IgG/IgM                      | results in 15 minutes, tests for IgM and IgG also exist separately       | China United States |
| 101 | SARS-CoV-2 IgG/IgM Rapid Qualitative Test                                                      |                                              | Telepoint Medical Services                    |                              | IgG/IgM                      |                                                                          |                     |
| 102 | VivaDiag COVID-19 IgM/IgG Rapid Test                                                           | lateral flow immunoassay                     | VivaChek Biotech (Hangzhou) Co. Ltd. (China)  | serum/whole blood            | IgG/IgM                      | results after 15 minutes                                                 | Australia           |
| 103 | Smart Test Covid-19 Vyttra                                                                     | Immunochromatography                         | Vyttra Diagnosticos                           | blood serum/plasma           | IgG/IgM                      | results in 10 minutes                                                    | Brazil              |
| 104 | New Coronavirus (2019-nCoV) IgM/IgG detection kit                                              | lateral flow immunoassay                     | Wuhan Easy Diagnosis Biomedicine Co., Ltd.    | whole blood/serum/plasma     | IgG/IgM                      |                                                                          |                     |
| 105 | Antibody test kit for novel coronavirus 2019-nCoV(Chemiluminescence microparticle immunoassay) | chemiluminescence microparticle immunoassay  | Xiamen Innodx Biotech Co., Ltd.               | serum/plasma                 | anti-Covid-19 total antibody |                                                                          | China               |
| 106 | COVID-19 IgG/IgM Rapid Test Cassette                                                           | lateral flow immunoassay                     | Zhejiang Orient Gene Biotech Co. Ltd. (China) | whole blood/serum/plasma     | IgG/IgM                      | results should appear within 10 minutes and are invalid after 15 minutes | Australia           |

|     |                                                                                  |                                     |                                |                    |         |                        |       |
|-----|----------------------------------------------------------------------------------|-------------------------------------|--------------------------------|--------------------|---------|------------------------|-------|
| 107 | Diagnostic Kit for IgM/IgG Antibody to Coronavirus (SARS-CoV-2) (Colloidal Gold) | colloidal gold immunochromatography | Zhuhai Livzon Diagnostics Inc. | blood serum/plasma | IgG/IgM | results in 150 seconds | China |
|-----|----------------------------------------------------------------------------------|-------------------------------------|--------------------------------|--------------------|---------|------------------------|-------|

**Supporting information II.** Highlights of patented technology for diagnosis of related coronavirus such as SARS-CoV and MERS-CoV

(1) Selected patents from the CAS content collection related to molecular genetic assays for detection of SARS-CoV and MERS-CoV

Patent applications WO2005025407 and WO2005025408 by Becton, Dickinson and Company (BD) disclose primers and probes specific for SARS-CoV nucleocapsid and replicase genes, and the use of these primers in real-time RT-PCR assays for virus detection. The sequences of the primers and probes used in the detection of SARS-CoV were disclosed. On April 3, 2020 BD in collaboration with BioGX Inc. announced that the U.S. Food and Drug Administration (FDA) granted Emergency Use Authorization (EUA) for a new diagnostic test (BioGX SARS-CoV-2 Reagents for BD MAX System) which will enable hospitals to screen for COVID-19 on-site and get their results in under 3 hours.<sup>12</sup> The assay is based on the same viral RNA targeting sequences and real-time PCR detection method as the test developed by the U.S. Centers for Disease Control and Prevention (CDC). BD and BioGX report that test will help to rapidly screen patients and healthcare workers.<sup>13</sup>

Patent application CN1598580 by Da An Gene Co. disclosed RNA-dependent RNA polymerase gene-specific primers and probes for early detection of SARS-CoV and their use in real-time PCR. The sequences of the forward and reverse primers were 5'-gacgagttcgtggtggtgac-3' (CAS RN 875025-39-1) and 5'-aagcttctgggccagttcct-3' (CAS RN 875025-40-4), respectively. The sequence of the probe used was 5'-caaatgaaagagctcagccccagatg-3' (CAS RN 875025-41-5). Using technologies found in this patent, Da An Gene developed a fluorescent PCR test [(Nucleic Acid reagent test kit for novel coronavirus 2019-nCoV (fluorometric PCR)) that targets the ORF1ab region and N gene of SARS-CoV-2].<sup>14</sup>



Patent application CN108060266 by Beijing Applied Biological Technology Co. discloses primers and fluorescent probes for detecting SARS-CoV and MERS-CoV using fluorescent reverse transcription-recombinase polymerase amplification (RT-RPA). The invention relates that RT-RPA does not need to convert the RNA into cDNA for the amplification reaction. In collaboration with the Institute of Pathogen Biology of Chinese Academy of Medical Sciences, the company developed a multiple real-time PCR kit [Nucleic Acid reagent test kit for novel coronavirus 2019-nCoV (fluorometric PCR)] for detection of 2019-nCoV, attaining NMPA certification on February 27, 2020.<sup>15</sup>

Patent applications WO2020050852 and US10072309 by Dr. Dougbeh-Chris Nyan disclose a multiplex real-time RT-LAMP for detecting pathogen bacteria and viruses. The inventions relate that the method utilizes 2 to 3 pairs of pathogen-specific oligonucleotides, including fluorogenic oligonucleotides that produce real-time nucleic acid amplification results representing different pathogens or different genotypes/species of a particular pathogen. The sequences of an extensive list of pathogen-specific RT-LAMP oligonucleotides/primers are disclosed, including those specific for SARS-CoV and MERS. Dr. Nyan discloses that the multiplex real-time RT-LAMP can detect up to 7 different viruses in less than one hour.<sup>16</sup>

Patent application WO2011146629 (Qiagen Gaithersburg) discloses the use of sequence-specific purification and multiplex amplification for detection of pathogens. Qiagen subsequently developed the QIAstat-Dx Respiratory SARS-CoV-2 Panel test that can differentiate SARS-CoV-2 from 20 other serious respiratory infections in about 1 hour. This is a multiplex nucleic acid test and the new panel includes two genes specific for SARS-CoV-2.<sup>17</sup>

(2) Selected patents from the CAS content collection related to serological and immunological assays for detection of SARS-CoV and MERS-CoV

Patent CN105510596 reports a multiplex assay that was developed for the detection of antibodies to respiratory virus antigens. The assay was constructed using a microscope slide substrate to provide a matrix array of immobilized viral antigens that included adenovirus, respiratory syncytial virus, parainfluenza virus, SARS virus, and influenza A viruses. Colorimetric or luminescent detection of bound anti-viral antibodies was assessed using biotin-conjugated secondary antibodies and streptavidin-labeled alkaline phosphatase (AP) or horseradish peroxidase (HRP).

Patent SG152020 reports that a dot-blot enzyme immunoassay (EIA) was utilized for the detection of serum antibodies to SARS coronavirus. In the protocol, heat-inactivated virus is absorbed to a nitrocellulose membrane and the antigen-dotted membrane is probed with diluted serum. Detection of bound antibodies is assessed using rabbit anti-human IgG-HRP and DAB (3, 3'-diaminobenzidine) substrate and the results interpreted visually.

Patent US20060188519 reports that a lateral rapid test strip was developed for the detection of serum IgM and IgG antibodies to SARS virus. The assay device comprises a nitrocellulose membrane having SARS test peptide(s) and control (Ig) lines. A glass fiber pad overlay contains gold-conjugated goat anti-human IgG and anti-IgM. A diluted or undiluted serum sample is allowed to flow laterally through the strip for 10 minutes and the results are assessed visually.

Patent WO2005047308 reports that an ELISA with improved sensitivity was developed by using antigenic peptides of SARS-CoV S, M, and N proteins and immunologically functional analogs in a 96-well micro-titer plate format. Horseradish peroxidase-conjugated goat antihuman IgG was used as a labeled tracer to bind the immune complexes formed in positive wells. The ELISA was used to characterize confirmed SARS patient sera and to survey healthcare workers.

Patent US20070092938 reports that a Western blot assay was performed using purified recombinant protein fragments separated by an SDS gradient (12-15%) PAGE gel and

transferred to a nitrocellulose membrane. The membranes were cut into 3-cm strips before incubating them with SARS positive and negative serum at 1:100 dilution at room temperature for 1 hour. The membrane strips were probed with human anti-IgG or IgM conjugated with horseradish peroxidase (HRP) and specific reaction bands were visualized by DAB (3,3'-diaminobenzidine tetrahydrochloride).

Table S3. Selected patents with SARS-CoV-related sequences for potential applications in diagnostics

| Patent Number | Title                                                                                                      | Patent Assignee                                 | Nucleic Acids | Proteins |
|---------------|------------------------------------------------------------------------------------------------------------|-------------------------------------------------|---------------|----------|
| CN1727486     | cDNA library of differential expression genes in lymphocytes from patients recovered from SARS             | General hospital of PLA, China                  | 95            |          |
| US7220852     | Isolation of human coronavirus (SARS-CoV), the causative agent of severe acute respiratory syndrome        | US Department of Health and Human Services, USA | 40            | 11       |
| US7361747     | Isolation and characterization of the SARS-associated coronavirus-like virus precursor of human SARS virus | The University of Hong Kong, China              | 7             | 2451     |
| WO2013083847  | Multiplex immuno screening assay (SARS)                                                                    | Institut Pasteur, France                        | 80            | 12       |

## References

1. “LabCorp launches test for coronavirus disease 2019 (COVID-19).” March 5, 2020. *News release*. Laboratory Corporation of America. [ir.labcorp.com/news-releases/news-release-details/labcorp-launches-test-coronavirus-disease-2019-covid-19](http://ir.labcorp.com/news-releases/news-release-details/labcorp-launches-test-coronavirus-disease-2019-covid-19)
2. “LabCorp’s at-home COVID-19 test kit is the first to be authorized by the FDA.” [techcrunch.com/2020/04/21/labcorps-at-home-covid-19-test-kit-is-the-first-to-be-authorized-by-the-fda/](http://techcrunch.com/2020/04/21/labcorps-at-home-covid-19-test-kit-is-the-first-to-be-authorized-by-the-fda/). accessed on 4/25/2020.
3. “Research Use Only 2019 – Novel Coronavirus (2019-nCoV) Real-time RT-PCR Primer and Probe Information.” Coronavirus Disease 2019 (COVID-19). April 10, 2020. Centers for Disease Control and Prevention. [www.cdc.gov/coronavirus/2019-ncov/lab/rt-pcr-panel-primer-probes.html](http://www.cdc.gov/coronavirus/2019-ncov/lab/rt-pcr-panel-primer-probes.html)
4. TaqPath COVID-19 Multiplex Diagnostic Solution. ThermoFisher Scientific. [www.thermofisher.com/us/en/home/clinical/clinical-genomics/pathogen-detection-solutions/coronavirus-2019-ncov/genetic-analysis/taqpath-rt-pcr-covid-19-kit.html](http://www.thermofisher.com/us/en/home/clinical/clinical-genomics/pathogen-detection-solutions/coronavirus-2019-ncov/genetic-analysis/taqpath-rt-pcr-covid-19-kit.html)

5. Allplex™ 2019-nCoV Assay. Seegene. [www.seegene.com/assays/allplex\\_2019\\_ncov\\_assay](http://www.seegene.com/assays/allplex_2019_ncov_assay). accessed on 4/25/2020.
6. cobas® SARS-CoV-2 Test. Roche. [diagnostics.roche.com/us/en/products/params/cobas-sars-cov-2-test.html](http://diagnostics.roche.com/us/en/products/params/cobas-sars-cov-2-test.html)). accessed on 4/25/2020.
7. ID NOW™ COVID-19, Abbott Laboratories. [www.alere.com/en/home/product-details/id-now-covid-19.html](http://www.alere.com/en/home/product-details/id-now-covid-19.html). accessed on 4/25/2020.
8. “An Update on Abbott’s Work on COVID-19 Testing.” April 15, 2020. Abbott Laboratories. [www.abbott.com/corpnewsroom/product-and-innovation/an-update-on-abbotts-work-on-COVID-19-testing.html](http://www.abbott.com/corpnewsroom/product-and-innovation/an-update-on-abbotts-work-on-COVID-19-testing.html)
9. Emergency Use Authorization. [www.fda.gov/medical-devices/emergency-situations-medical-devices/emergency-use-authorizations# covid19ivd](http://www.fda.gov/medical-devices/emergency-situations-medical-devices/emergency-use-authorizations# covid19ivd). accessed on 4/25/2020.
10. World Health Organization. SARS-CoV-2 Nucleic Acid Tests: progress of the active applications in the emergency use listing assessment pipeline. [www.who.int/diagnostics\\_laboratory/200427\\_eul\\_covid19\\_ivd\\_update.pdf?ua=1](http://www.who.int/diagnostics_laboratory/200427_eul_covid19_ivd_update.pdf?ua=1). accessed on 4/25/2020.
11. World Health Organization. COVID-19 listing in IMDRF jurisdiction, collated table 27 April 20202. [www.who.int/diagnostics\\_laboratory/EUL/en/](http://www.who.int/diagnostics_laboratory/EUL/en/)
12. Hinton, D. M. Emergency use authorization for BioGX SARS-CoV-2 Reagents for BD MAX System (Becton, Dickinson & Company (BD)). April 2, 2020. U.S. Food & Drug Administration, 1-8. [www.fda.gov/media/136650/download](http://www.fda.gov/media/136650/download)
13. “BD, BioGX Announce FDA Emergency Use Authorization for New COVID-19 Diagnostic for Use in U.S.” April 3, 2020. Becton, Dickinson and Company (BD). [www.bd.com/en-us/company/news-and-media/press-releases/bd-biogx-announce-fda-emergency-use-authorization--for-new-covid-19-diagnostics-for-use-in-us](http://www.bd.com/en-us/company/news-and-media/press-releases/bd-biogx-announce-fda-emergency-use-authorization--for-new-covid-19-diagnostics-for-use-in-us)
14. “Nucleic Acid reagent test kit for novel coronavirus 2019-nCoV (fluorometric PCR)” Da An Gene. [prolabcorp.com/daan-rt-pcr-reagent-set-for-covid-19-real-time-detection-for-48-samples-research-use-only/](http://prolabcorp.com/daan-rt-pcr-reagent-set-for-covid-19-real-time-detection-for-48-samples-research-use-only/)
15. Multiple Real-Time PCR Kit for Detection of 2019-nCoV. Beijing Applied Biological Technologies Co., Ltd. [www.x-abt.com/index.php?m=content&c=index&a=lists&catid=147](http://www.x-abt.com/index.php?m=content&c=index&a=lists&catid=147)
16. “US Patent Issued to Liberian Scientist for Multiplex Infectious Disease Test” Daily Observer. October 1, 2018. [www.liberianobserver.com/news/us-patent-issued-to-liberian-scientist-for-multiplex-infectious-disease-test/](http://www.liberianobserver.com/news/us-patent-issued-to-liberian-scientist-for-multiplex-infectious-disease-test/)
17. “US Patent Issued to Liberian Scientist for Multiplex Infectious Disease Test” Daily Observer. October 1, 2018. [www.liberianobserver.com/news/us-patent-issued-to-liberian-scientist-for-multiplex-infectious-disease-test/](http://www.liberianobserver.com/news/us-patent-issued-to-liberian-scientist-for-multiplex-infectious-disease-test/)
